# Supplementary figures and images for: Criminal Behavior and Victimization Among Homeless Individuals With Severe Mental Illness: A Systematic Review
Source: Atypon-hosted journal article supplement (doi:10.1176/appi.ps.201200515), 2014-02-18

Figure 1. Flow of information in systematic review process

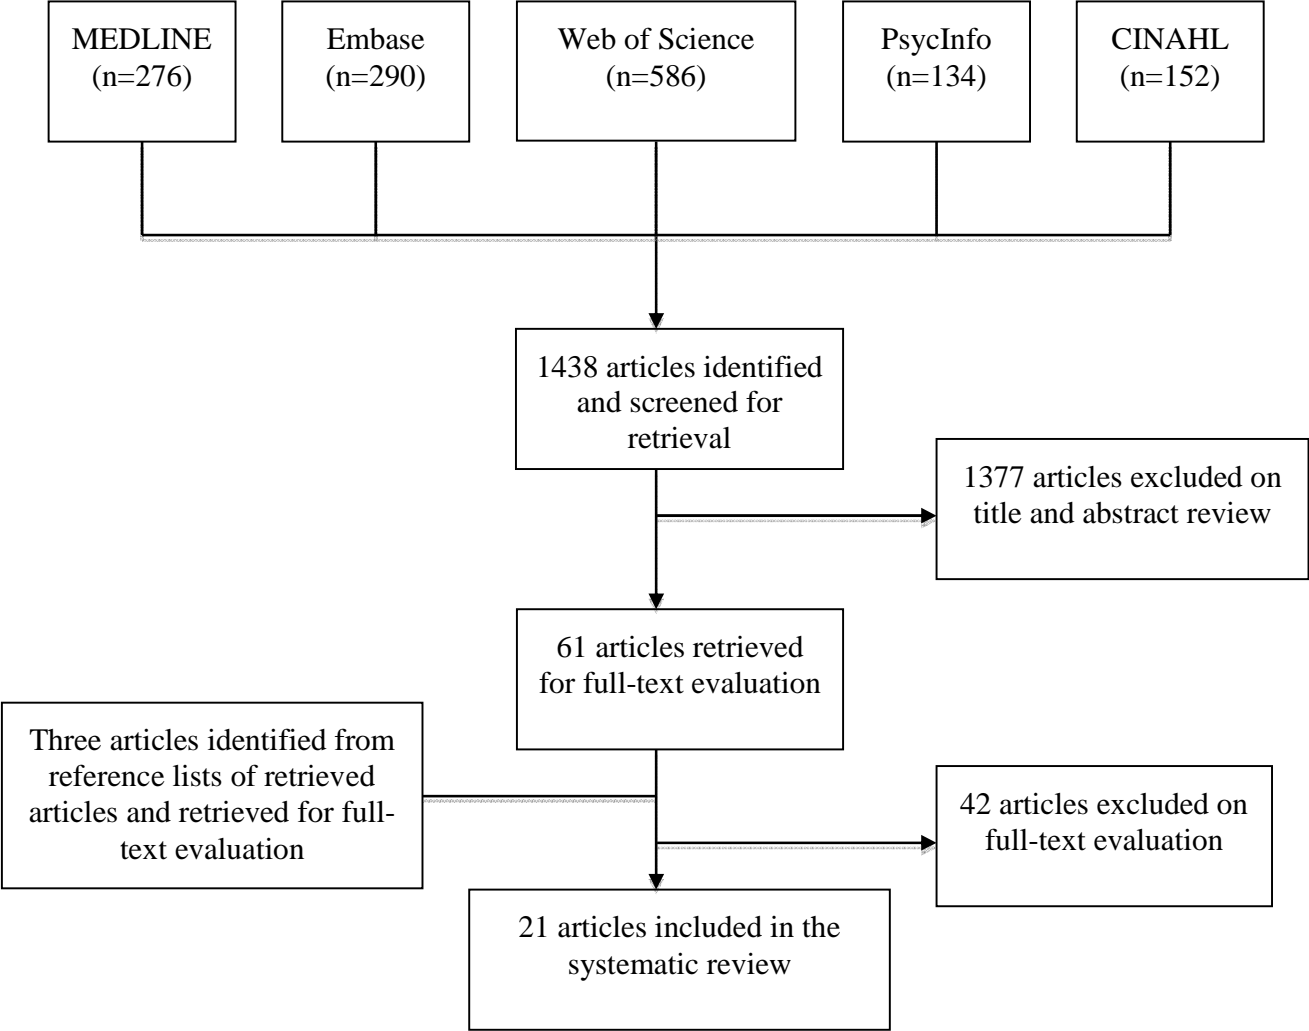

Supplement: 739_ds001.pdf [file 739_ds001.pdf]
